# Supplementary material for: Enhanced electrocatalytic performance of graphene via incorporation of SiO2 nanoparticles for dye-sensitized solar cells
Source: Royal Society of Chemistry journal article supplement (doi:10.1039/c2jm33483f), 2012-01-01
Supplement: c2jm33483f.pdf [file c2jm33483f.pdf]

## Electronic Supplementary Information (ESI)

# Enhanced Electrocatalytic Performance of Graphene Counter Electrode *via* Incorporation of SiO<sub>2</sub> Nanoparticles for Dye-Sensitized Solar Cells

Feng Gong, Zhuoqun Li, Hong Wang and Zhong-Sheng Wang\*

Department of Chemistry & Lab of Advanced Materials, Fudan University, 2205  
Songhu Road, Shanghai 200438, PR China.

\* Corresponding author: E-mail: zs.wang@fudan.edu.cn, Fax/Tel: +86-21-5163-0345

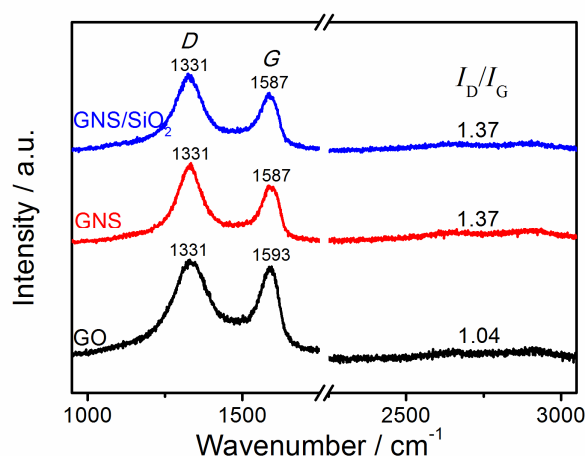

**Fig. S1** Raman spectra for GO, GNS and GNS/SiO<sub>2</sub> products

Fig. S1 depicts the typical Raman spectra of GO, GNS and GNS/SiO<sub>2</sub>. The spectrum for GO shows two prominent bands located at 1593 cm<sup>-1</sup> (G band) and 1331 cm<sup>-1</sup> (D band), which are usually assigned to zone center phonons of  $E_{2g}$  symmetry and  $K$ -point phonons of  $A_{1g}$  symmetry, respectively.<sup>1</sup> Thus, the intensity ratio of the D and G band ( $I_D/I_G$ ) is usually taken as an indication of the relative disorder present in graphitic structures. The spectrum for GNS displays G and D bands at 1587 and 1331 cm<sup>-1</sup>, respectively. The G band shifts from 1593 to 1587 cm<sup>-1</sup>, which confirms the reduction of GO to GNS during the chemical treatment.<sup>2</sup> Furthermore, the  $I_D/I_G$  varies from 1.04 for GO to 1.37 for GNS. This change suggests a decrease in the average size of the sp<sup>2</sup> domains upon reduction of the exfoliated GO.<sup>3</sup> For the GNS/SiO<sub>2</sub> composite, the position and intensity of D band and G band have scarcely changed upon incorporation of SiO<sub>2</sub>, indicating a physical adsorption mode on GNS. It has

been reported that silica, when noncovalently attached to carbon nanotubes, did not influence the band position and intensity ratio of D band to G band.<sup>4</sup>

## References

1. A. C. Ferrari and J. Robertson, *Phys. Rev. B*, 2000, **61**, 14095.
2. W. Chen, L. Yan and P. R. Bangal, *J. Phys. Chem. C*, 2010, **114**, 19885.
3. S. Stankovich, D. A. Dikin, R. D. Piner, K. A. Kohlhaas, A. Kleinhammes, Y. Jia, Y. Wu, S. T. Nguyen and R. S. Ruoff, *Carbon*, 2007, **45**, 1558.
4. L. Kou and C. Gao, *Nanoscale*, 2011, **3**, 519.
